# Supplementary material for: Ganglioside GD3 Regulates Inflammation and Epithelial-to-Mesenchymal Transition in Human Nasal Epithelial Cells
Source: MDPI journal article supplement (doi:10.3390/ijms25074054), 2024-04-05
Supplement: s1 [file s1]

# Supplementary Materials: Ganglioside GD3 Regulates Inflammation and Epithelial-To-Mesenchymal Transition in Human Nasal Epithelial Cells

Ji Hyeon Hwang <sup>1,2,†</sup>, Jae-Sung Ryu <sup>1,†,‡</sup>, Jin Ok Yu <sup>3</sup>, Young-Kug Choo <sup>3,4</sup>, Jaeku Kang <sup>2,5,\*</sup> and Jong-Yeup Kim <sup>1,\*</sup>

<sup>1</sup> Department of Otorhinolaryngology-Head and Neck Surgery, College of Medicine, Konyang University Hospital, Daejeon 35365, Republic of Korea; wgdrww5@gmail.com (J.H.H.); jsryu@kbiohealth.kr (J.-S.R.)

<sup>2</sup> Department of Pharmacology, College of Medicine, Konyang University, Daejeon 35365, Republic of Korea

<sup>3</sup> Department of Biological Science, College of Natural Sciences, Wonkwang University, Iksan 54538, Republic of Korea; yjo9703@naver.com (J.O.Y.); ykchoo@wku.ac.kr (Y.-K.C.)

<sup>4</sup> Institute for Glycoscience, Wonkwang University, Iksan 54538, Republic of Korea

<sup>5</sup> Priority Research Center, Myungmok Medical Research Institute, College of Medicine, Konyang University, Daejeon 35365, Republic of Korea

\* Correspondence: jaeku@konyang.ac.kr (J.K.); jykim@kyuh.ac.kr (J.-Y.K.); Tel.: +82-42-600-9215 (J.K. & J.-Y.K.); Fax: +82-42-543-8959 (J.K. & J.-Y.K.)

† These authors contributed equally to this work.

‡ Current address: Division of Biodrug Evaluation, New Drug Development Center, Osong Medical Innovation Foundation (K-Bio Health), Cheongju 28160, Republic of Korea.

**Supplementary Table S1.** List of antibodies used in this study

| Antibody                          | Company                  | Cat. No. | Application & Dilution  |
|-----------------------------------|--------------------------|----------|-------------------------|
| E-CADHERIN                        | Cell signaling           | #3195    | WB; 1:1,000 / IF; 1:200 |
| N-CADHERIN                        | ABclonal                 | A19083   | WB; 1:500 / IF; 1:100   |
| SLUG                              | Cell signaling           | #9585    | WB; 1,000 / IF; 1:400   |
| NK-κB p65                         | Cell signaling           | #3039    | WB; 1,000               |
| β-ACTIN                           | Sigma-Aldrich            | A5441    | WB; 1:5,000             |
| Histone H3                        | Cell signaling           | #4499    | WB; 1:2,000             |
| Donkey anti-mouse IgG, Alexa 488  | Thermo Fisher Scientific | A-21202  | IF; 1:400               |
| Donkey anti-rabbit IgG, Alexa 555 | Thermo Fisher Scientific | A-31572  | IF; 1:400               |
| Goat anti-Mouse-HRP               | Thermo Fisher Scientific | G-21040  | WB; 1:10,000            |

|                      |                          |         |              |
|----------------------|--------------------------|---------|--------------|
| Goat anti-Rabbit-HRP | Thermo Fisher Scientific | G-21324 | WB; 1:10,000 |
| DAPI                 | Sigma-Aldrich            | D9542   | IF; 30 nM    |

**Supplementary Table S2.** siRNA sequences for the knock-down of GD3 synthase (ST8Sia1)

| Gene                | Cat. No. | Sequence                                                                 |
|---------------------|----------|--------------------------------------------------------------------------|
| <i>siST8SIA1 #1</i> | 1021-1   | CAC UUG GAC CAU GAC AGU A=tt(1-AS)<br>UAC UGU CAU GGU CCA AGU G=tt(1-AA) |
| <i>siST8SIA1 #2</i> | 1021-2   | ACA GCU UUG AUA CAC AGU A=tt(2-AS)<br>UAC UGU GUA UCAAAG CUG U=tt(2-AA)  |
| <i>siST8SIA1 #3</i> | 1021-3   | CUG UAC UGG CGU GGA AGU U=tt(3-AS)<br>AAC UUC CAC GCC AGU ACA G=tt(3-AA) |

**Supplementary Table S3.** Primer sequences used for qPCR analysis

| Gene           | Sequence (5'-3')                   | Product size |
|----------------|------------------------------------|--------------|
| <i>IL-6</i>    | F: 5'- ACTCACCTCTTCAGAACGAATTG-3'  | 149 bp       |
|                | R: 5'- CCATCTTTGGAAGGTTTCAGGTTG-3' |              |
| <i>IL-8</i>    | F: 5'- ACTGAGAGTGATTGAGAGTGGAC-3'  | 112 bp       |
|                | R: 5'- AACCCTCTGCACCCAGTTTTTC-3'   |              |
| <i>E-CAD</i>   | F: 5'- ATTTTCCCTCGACACCCGAT-3'     | 109 bp       |
|                | R: 5'- TCCCAGGCGTAGACCAAGA-3'      |              |
| <i>N-CAD</i>   | F: 5'- AGCCAACCTTAACTGAGGAGT-3'    | 136 bp       |
|                | R: 5'- GGCAAGTTGATTGGAGGGATG-3'    |              |
| <i>SLUG</i>    | F: 5'- CTAAGTGGACACACATACAGTG-3'   | 87 bp        |
|                | R: 5'- CTGAGGATCTCTGGTTGTGGT-3'    |              |
| <i>MMP-9</i>   | F: 5'- AGACCTGGGCAGATTCCAAAC-3'    | 94 bp        |
|                | R: 5'- AGGCAAGTCTTCCGAGTAGT-3'     |              |
| <i>ST8SIA1</i> | F: 5'- CATGCGATGCAATCTCCCTC-3'     | 84 bp        |
|                | R: 5'- CTGGGATTAGCTGTCACTAACTG-3'  |              |
| <i>CD73</i>    | F: 5'- AAGGACTGATCGAGCCACTC-3'     | 161 bp       |

|                |                                   |        |
|----------------|-----------------------------------|--------|
|                | R: 5'- GGAAGTGTATCCAACGATTCCCA-3' |        |
| <i>CD90</i>    | F: 5'- ATGAAGGTCCTCTACTTATCCGC-3' |        |
|                | R: 5'- GCACTGTGACGTTCTGGGA-3'     | 112 bp |
| <i>CD105</i>   | F: 5'- GCATCCTTCGTGGAGCTACC-3'    |        |
|                | R: 5'- GAGGAGTGGTCTGGATCGG-3'     | 103 bp |
| <i>β-ACTIN</i> | F: 5'- TCCTCTCCCAAGTCCACACAGG-3'  |        |
|                | R: 5'- GGGCACGAAGGCTCATCATTC-3'   | 131 bp |

---

## Supplementary Figure Legends

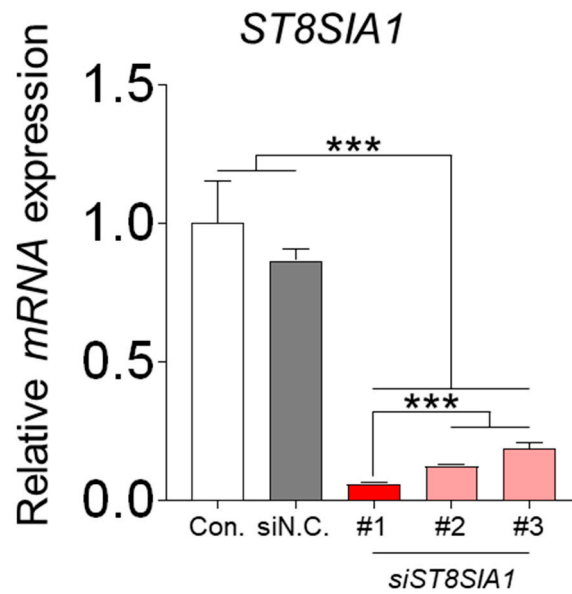

**Figure S1. Knock-down efficiency of ST8Sia1 (GD3 synthase) expression in hNECs.**

hNECs were transfected with three different ST8Sia 1-targeting siRNAs (siST8Sia1 #1~#3). After 48 hours, siST8Sia1 #1 was found to significantly reduce the ST8Sia1 mRNA expression. mRNA expression levels were normalized to the housekeeping gene,  $\beta$ -Actin. The values shown are the mean  $\pm$  SD ( $n = 6$ ) and analyzed by Student's t-test. \*\*\* $P < 0.001$ .
